# Supplementary material for: Selection of Reference Genes for Transcription Studies Considering Co-Regulation and Average Transcriptional Stability: Case Study on Adventitious Root Induction in Olive (Olea europaea L.) Microshoots
Source: MDPI journal article supplement (doi:10.3390/agronomy12123201), 2022-12-16

Figure S2. Analysis of Hsp transcript accumulation when normalized with NF2 and NF3 sets of reference genes.

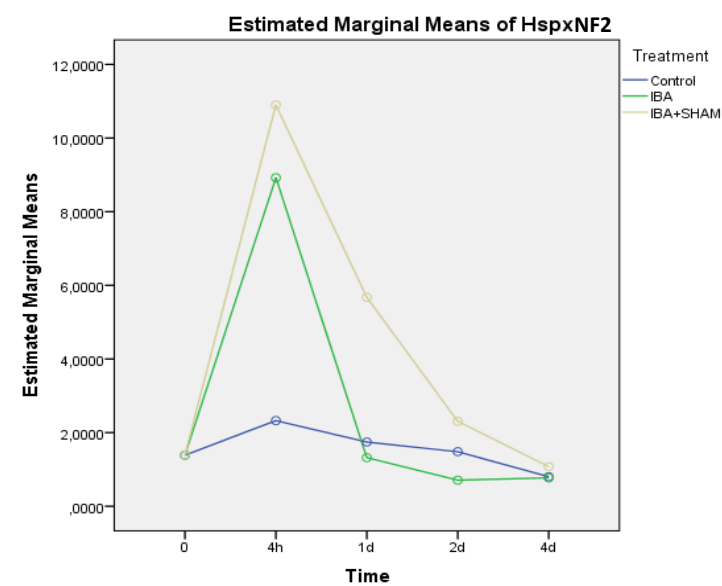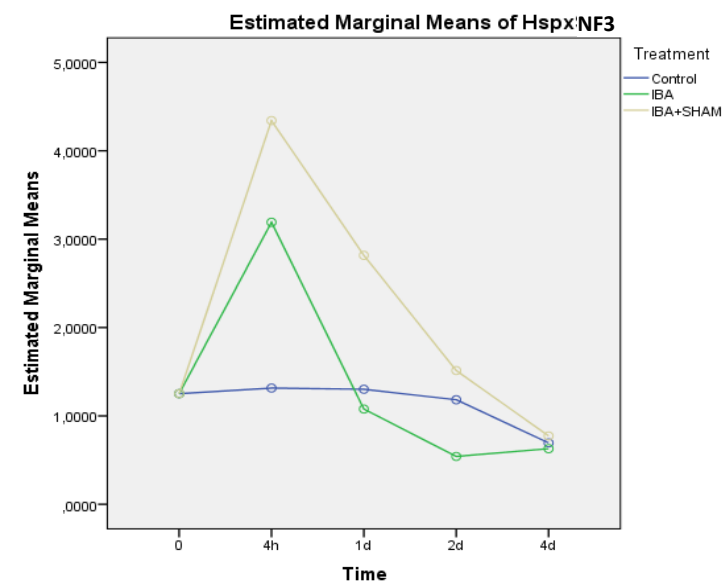

Supplement: s1 [file s1]
