# Supplementary material for: Selection of Reference Genes for Transcription Studies Considering Co-Regulation and Average Transcriptional Stability: Case Study on Adventitious Root Induction in Olive (Olea europaea L.) Microshoots
Source: MDPI journal article supplement (doi:10.3390/agronomy12123201), 2022-12-16
Supplement: s1 [file s1]

Table S2. Significance tests comparing NF3 and NF2 normalization of an unstably expressed target gene (Hsp)

| Hsp x NF2                         |                         |    |             |         |      |                    |                             |
|-----------------------------------|-------------------------|----|-------------|---------|------|--------------------|-----------------------------|
| Tests of Between-Subjects Effects |                         |    |             |         |      |                    |                             |
| Source                            | Type III Sum of Squares | df | Mean Square | F       | Sig. | Noncent. Parameter | Observed Power <sup>a</sup> |
| Corrected Model                   | 990.632 <sup>a</sup>    | 28 | 35.380      | 21.529  | .000 | 602.806            | 1.000                       |
| Intercept                         | 712.249                 | 1  | 712.249     | 433.408 | .000 | 433.408            | 1.000                       |
| Time                              | 510.758                 | 4  | 127.690     | 77.700  | .000 | 310.800            | 1.000                       |
| Treatment                         | 112.677                 | 2  | 56.339      | 34.282  | .000 | 68.565             | 1.000                       |
| Assay                             | 31.555                  | 2  | 15.778      | 9.601   | .000 | 19.202             | .976                        |
| Time * Treatment                  | 206.342                 | 8  | 25.793      | 15.695  | .000 | 125.560            | 1.000                       |
| Time * Assay                      | 121.526                 | 8  | 15.191      | 9.244   | .000 | 73.949             | 1.000                       |
| Treatment * Assay                 | 7.774                   | 4  | 1.943       | 1.183   | .327 | 4.730              | .349                        |
| Error                             | 100.245                 | 61 | 1.643       |         |      |                    |                             |
| Total                             | 1803.127                | 90 |             |         |      |                    |                             |
| Corrected Total                   | 1090.878                | 89 |             |         |      |                    |                             |

a. R Squared = .908 (Adjusted R Squared = .866)

b. Computed using alpha = .05

| Pairwise Comparisons |         |     |          |                       |            |                   |                                                     |
|----------------------|---------|-----|----------|-----------------------|------------|-------------------|-----------------------------------------------------|
| Time                 | Control | IBA | IBA+SHAM | Mean Difference (I-J) | Std. Error | Sig. <sup>b</sup> | 95% Confidence Interval for Lower Bound Upper Bound |
| 0                    | Control | IBA | IBA+SHAM | -1.583E-16            | .740       | 1.000             | -1.822 1.822                                        |
|                      |         | IBA | IBA+SHAM | 1.470E-15             | .740       | 1.000             | -1.822 1.822                                        |
|                      |         | IBA | IBA+SHAM | 1.583E-16             | .740       | 1.000             | -1.822 1.822                                        |
| 4h                   | Control | IBA | IBA+SHAM | 1.628E-15             | .740       | 1.000             | -1.822 1.822                                        |
|                      |         | IBA | IBA+SHAM | -1.470E-15            | .740       | 1.000             | -1.822 1.822                                        |
|                      |         | IBA | IBA+SHAM | -1.628E-15            | .740       | 1.000             | -1.822 1.822                                        |
| 1d                   | Control | IBA | IBA+SHAM | -6.596 <sup>a</sup>   | .740       | .000              | -8.418 -4.774                                       |
|                      |         | IBA | IBA+SHAM | -8.575 <sup>a</sup>   | .740       | .000              | -10.397 -6.753                                      |
|                      |         | IBA | IBA+SHAM | 6.596 <sup>a</sup>    | .740       | .000              | 4.774 8.418                                         |
| 2d                   | Control | IBA | IBA+SHAM | -1.979 <sup>a</sup>   | .740       | .029              | -3.801 -.157                                        |
|                      |         | IBA | IBA+SHAM | 8.575 <sup>a</sup>    | .740       | .000              | 6.753 10.397                                        |
|                      |         | IBA | IBA+SHAM | 1.979 <sup>a</sup>    | .740       | .029              | -.157 3.801                                         |
| 4d                   | Control | IBA | IBA+SHAM | -4.425 <sup>a</sup>   | .740       | 1.000             | -1.397 2.247                                        |
|                      |         | IBA | IBA+SHAM | -3.926 <sup>a</sup>   | .740       | .000              | -5.750 -2.106                                       |
|                      |         | IBA | IBA+SHAM | -4.425 <sup>a</sup>   | .740       | 1.000             | -2.247 1.397                                        |
| 1d                   | Control | IBA | IBA+SHAM | -4.353 <sup>a</sup>   | .740       | .000              | -6.175 -2.531                                       |
|                      |         | IBA | IBA+SHAM | 3.926 <sup>a</sup>    | .740       | .000              | 2.106 5.750                                         |
|                      |         | IBA | IBA+SHAM | 4.353 <sup>a</sup>    | .740       | .000              | 2.531 6.175                                         |
| 2d                   | Control | IBA | IBA+SHAM | .773                  | .740       | .902              | -1.049 2.595                                        |
|                      |         | IBA | IBA+SHAM | -.825                 | .740       | .808              | -2.647 .997                                         |
|                      |         | IBA | IBA+SHAM | -.773                 | .740       | .902              | -2.595 1.049                                        |
| 4d                   | Control | IBA | IBA+SHAM | -1.598                | .740       | .104              | -3.420 2.24                                         |
|                      |         | IBA | IBA+SHAM | .825                  | .740       | .808              | -.997 2.647                                         |
|                      |         | IBA | IBA+SHAM | 1.598                 | .740       | .104              | -2.24 3.420                                         |
| 1d                   | Control | IBA | IBA+SHAM | .030                  | .740       | 1.000             | -1.792 1.852                                        |
|                      |         | IBA | IBA+SHAM | -.276                 | .740       | 1.000             | -2.098 1.547                                        |
|                      |         | IBA | IBA+SHAM | -.030                 | .740       | 1.000             | -1.852 1.792                                        |
| 4d                   | Control | IBA | IBA+SHAM | -.306                 | .740       | 1.000             | -2.128 1.516                                        |
|                      |         | IBA | IBA+SHAM | .276                  | .740       | 1.000             | -1.547 2.098                                        |
|                      |         | IBA | IBA+SHAM | -.306                 | .740       | 1.000             | -1.516 2.128                                        |

Based on estimated marginal means

\*. The mean difference is significant at the .05 level.

b. Adjustment for multiple comparisons: Bonferroni.

| Pairwise Comparisons |    |                       |                    |                     |                     |             |         |                             |        |  |  |
|----------------------|----|-----------------------|--------------------|---------------------|---------------------|-------------|---------|-----------------------------|--------|--|--|
| Dependent Vari       |    | HspαNF2               |                    |                     |                     |             |         | 95% Confidence Interval for |        |  |  |
| Treatment            |    | Mean Difference (I-J) | Std. Error         | Sig. <sup>b</sup>   | Lower Bound         | Upper Bound |         |                             |        |  |  |
| Control              | 0  | 4h                    | -.938              | .740                | 1.000               | -3.094      | 1.218   |                             |        |  |  |
|                      |    | 1d                    | -.356              | .740                | 1.000               | -2.512      | 1.799   |                             |        |  |  |
|                      |    | 2d                    | -.094              | .740                | 1.000               | -2.249      | 2.062   |                             |        |  |  |
|                      |    | 4d                    | .586               | .740                | 1.000               | -1.570      | 2.742   |                             |        |  |  |
|                      |    | 4h                    | 0                  | .938                | .740                | 1.000       | -1.218  | 3.094                       |        |  |  |
|                      |    |                       | 1d                 | .582                | .740                | 1.000       | -1.574  | 2.737                       |        |  |  |
|                      |    |                       | 2d                 | .845                | .740                | 1.000       | -1.311  | 3.000                       |        |  |  |
|                      |    |                       | 4d                 | 1.524               | .740                | .437        | -.632   | 3.680                       |        |  |  |
|                      |    | 1d                    | 0                  | -.356               | .740                | 1.000       | -1.799  | 2.512                       |        |  |  |
|                      |    |                       | 4h                 | -.582               | .740                | 1.000       | -2.737  | 1.574                       |        |  |  |
|                      |    |                       | 2d                 | .263                | .740                | 1.000       | -1.893  | 2.419                       |        |  |  |
|                      |    |                       | 4d                 | .943                | .740                | 1.000       | -1.213  | 3.098                       |        |  |  |
|                      | 2d | 0                     | -.094              | .740                | 1.000               | -2.062      | 2.249   |                             |        |  |  |
|                      |    | 4h                    | -.845              | .740                | 1.000               | -3.000      | 1.311   |                             |        |  |  |
|                      |    | IBA                   | 0                  | 1d                  | -.263               | .740        | 1.000   | -2.419                      | 1.893  |  |  |
|                      |    |                       |                    | 4d                  | .680                | .740        | 1.000   | -1.476                      | 2.835  |  |  |
|                      | 2d |                       |                    | 0                   | .586                | .740        | 1.000   | -2.742                      | 1.570  |  |  |
|                      | 4h |                       |                    | 0                   | -1.524              | .740        | .437    | -3.680                      | .632   |  |  |
|                      | 4h |                       | 1d                 | -.943               | .740                | 1.000       | -3.098  | 1.213                       |        |  |  |
|                      |    |                       | 2d                 | 0                   | -.680               | .740        | 1.000   | -2.835                      | 1.476  |  |  |
|                      |    |                       | 4h                 | 0                   | -7.534 <sup>a</sup> | .740        | .000    | -9.690                      | -5.378 |  |  |
|                      |    |                       | 1d                 | 0                   | .068                | .740        | 1.000   | -2.088                      | 2.224  |  |  |
|                      | 1d |                       | 2d                 | .679                | .740                | 1.000       | -1.477  | 2.835                       |        |  |  |
|                      |    |                       | 4d                 | 0                   | .616                | .740        | 1.000   | -1.539                      | 2.772  |  |  |
| 2d                   |    |                       | 0                  | 7.534 <sup>a</sup>  | .740                | .000        | 5.378   | 9.690                       |        |  |  |
|                      |    |                       | 4h                 | 1d                  | 7.602 <sup>a</sup>  | .740        | .000    | 5.446                       | 9.758  |  |  |
|                      | 2d | 0                     | 8.213 <sup>a</sup> | .740                | .000                | 6.057       | 10.369  |                             |        |  |  |
|                      | 4d | 0                     | 8.150 <sup>a</sup> | .740                | .000                | 5.995       | 10.306  |                             |        |  |  |
| IBA+SHAM             | 0  | 4h                    | 0                  | -.068               | .740                | 1.000       | -2.224  | 2.088                       |        |  |  |
|                      |    | 1d                    | 0                  | -7.602 <sup>a</sup> | .740                | .000        | -9.758  | -5.446                      |        |  |  |
|                      |    | 2d                    | 0                  | .611                | .740                | 1.000       | -1.545  | 2.767                       |        |  |  |
|                      |    | 4d                    | 0                  | .548                | .740                | 1.000       | -1.608  | 2.704                       |        |  |  |
|                      | 4h | 0                     | -.679              | .740                | 1.000               | -2.835      | 1.477   |                             |        |  |  |
|                      |    | 1d                    | 0                  | -8.213 <sup>a</sup> | .740                | .000        | -10.369 | -6.057                      |        |  |  |
|                      |    | 2d                    | 0                  | -.611               | .740                | 1.000       | -2.767  | 1.545                       |        |  |  |
|                      |    | 4d                    | 0                  | -.063               | .740                | 1.000       | -2.219  | 2.093                       |        |  |  |
|                      | 1d | 0                     | 0                  | .616                | .740                | 1.000       | -2.772  | 1.539                       |        |  |  |
|                      |    | 4h                    | 0                  | -8.150 <sup>a</sup> | .740                | .000        | -10.306 | -5.995                      |        |  |  |
|                      |    | 2d                    | 0                  | -.548               | .740                | 1.000       | -2.704  | 1.608                       |        |  |  |
|                      |    | 4d                    | 0                  | .063                | .740                | 1.000       | -2.093  | 2.219                       |        |  |  |
| IBA+SHAM             | 0  | 4h                    | 0                  | -9.513 <sup>a</sup> | .740                | .000        | -11.669 | -7.357                      |        |  |  |
|                      |    | 1d                    | 0                  | -4.284 <sup>a</sup> | .740                | .000        | -6.440  | -2.129                      |        |  |  |
|                      |    | 2d                    | 0                  | -.918               | .740                | 1.000       | -3.074  | 1.237                       |        |  |  |
|                      |    | 4d                    | 0                  | .311                | .740                | 1.000       | -1.845  | 2.466                       |        |  |  |
|                      | 4h | 0                     | 9.513 <sup>a</sup> | .740                | .000                | 7.357       | 11.669  |                             |        |  |  |
|                      |    | 1d                    | 0                  | 5.229 <sup>a</sup>  | .740                | .000        | 3.073   | 7.385                       |        |  |  |
|                      |    | 2d                    | 0                  | 8.595 <sup>a</sup>  | .740                | .000        | 6.439   | 10.750                      |        |  |  |
|                      |    | 4d                    | 0                  | 9.824 <sup>a</sup>  | .740                | .000        | 7.668   | 11.980                      |        |  |  |
|                      | 1d | 0                     | 4.284 <sup>a</sup> | .740                | .000                | 2.129       | 6.440   |                             |        |  |  |
|                      |    | 4h                    | 0                  | -5.229 <sup>a</sup> | .740                | .000        | -7.385  | -3.073                      |        |  |  |
|                      |    | 2d                    | 0                  | 3.366 <sup>a</sup>  | .740                | 1.000       | 1.210   | 5.522                       |        |  |  |
|                      |    | 4d                    | 0                  | 4.595 <sup>a</sup>  | .740                | .000        | 2.439   | 6.751                       |        |  |  |
| IBA+SHAM             | 0  | 2d                    | 0                  | .918                | .740                | 1.000       | -1.237  | 3.074                       |        |  |  |
|                      |    | 4h                    | 0                  | -8.595 <sup>a</sup> | .740                | .000        | -10.750 | -6.439                      |        |  |  |
|                      |    | 1d                    | 0                  | -3.366 <sup>a</sup> | .740                | .000        | -5.522  | -1.210                      |        |  |  |
|                      |    | 4d                    | 0                  | 1.229               | .740                | 1.000       | -.927   | 3.385                       |        |  |  |
|                      | 4d | 0                     | 0                  | -.311               | .740                | 1.000       | -2.466  | 1.845                       |        |  |  |
|                      |    | 1d                    | 0                  | -9.824 <sup>a</sup> | .740                | .000        | -11.980 | -7.668                      |        |  |  |
|                      |    | 2d                    | 0                  | -4.595 <sup>a</sup> | .740                | .000        | -6.751  | -2.439                      |        |  |  |
|                      |    | 4d                    | 0                  | -1.229              | .740                | 1.000       | -3.385  | .927                        |        |  |  |

Based on estimated marginal means

\*. The mean difference is significant at the .05 level.

b. Adjustment for multiple comparisons: Bonferroni.

| Hsp x NF3                         |                         |    |             |         |      |                    |                             |
|-----------------------------------|-------------------------|----|-------------|---------|------|--------------------|-----------------------------|
| Tests of Between-Subjects Effects |                         |    |             |         |      |                    |                             |
| Source                            | Type III Sum of Squares | df | Mean Square | F       | Sig. | Noncent. Parameter | Observed Power <sup>a</sup> |
| Corrected Model                   | 55.295 <sup>a</sup>     | 28 | 1.975       | 7.678   | .000 | 214.981            | 1.000                       |
| Intercept                         | 107.026                 | 1  | 107.026     | 416.105 | .000 | 416.105            | 1.000                       |
| Time                              | 27.228                  | 4  | 6.807       | 26.465  | .000 | 105.859            | 1.000                       |
| Treatment                         | 8.291                   | 2  | 4.146       | 16.118  | .000 | 32.235             | .998                        |
| Assay                             | 1.237                   | 2  | .618        | 2.405   | .122 | 4.809              | .414                        |
| Time * Treatment                  | 12.579                  | 8  | 1.572       | 6.113   | .001 | 48.908             | .991                        |
| Time * Assay                      | 5.863                   | 8  | .733        | 2.850   | .036 | 22.796             | .789                        |
| Treatment * Assay                 | .096                    | 4  | .024        | .094    | .983 | .374               | .065                        |
| Error                             | 4.115                   | 16 | .257        |         |      |                    |                             |
| Total                             | 166.436                 | 45 |             |         |      |                    |                             |
| Corrected Total                   | 59.410                  | 44 |             |         |      |                    |                             |

a. R Squared = .931 (Adjusted R Squared = .810)

b. Computed using alpha = .05

| Pairwise Comparisons   |          |          |                  |            |                   |                             |             |
|------------------------|----------|----------|------------------|------------|-------------------|-----------------------------|-------------|
| Dependent Vari HspαNF3 |          |          |                  |            |                   |                             |             |
| Time                   |          |          | Mean             |            | Sig. <sup>a</sup> | 95% Confidence Interval for |             |
|                        |          |          | Difference (I-J) | Std. Error |                   | Lower Bound                 | Upper Bound |
| 0                      | Control  | IBA      | -2.350E-16       | .414       | 1.000             | -1.107                      | 1.107       |
|                        |          | IBA+SHAM | 5.739E-16        | .414       | 1.000             | -1.107                      | 1.107       |
|                        |          | IBA      | 2.350E-16        | .414       | 1.000             | -1.107                      | 1.107       |
|                        | IBA+SHAM | IBA+SHAM | 8.090E-16        | .414       | 1.000             | -1.107                      | 1.107       |
|                        |          | Control  | -5.739E-16       | .414       | 1.000             | -1.107                      | 1.107       |
|                        |          | IBA      | -8.090E-16       | .414       | 1.000             | -1.107                      | 1.107       |
| 4h                     | Control  | IBA      | -1.876           | .414       | .001              | -2.983                      | -.769       |
|                        |          | IBA+SHAM | -3.027           | .414       | .000              | -4.134                      | -1.920      |
|                        |          | IBA      | 1.876            | .414       | .001              | -.769                       | 2.983       |
|                        | IBA+SHAM | IBA+SHAM | -1.151           | .414       | .040              | -2.258                      | -.044       |
|                        |          | Control  | 3.027            | .414       | .000              | 1.920                       | 4.134       |
|                        |          | IBA      | 1.151            | .414       | .040              | .044                        | 2.258       |
| 1d                     | Control  | IBA      | .224             | .414       | 1.000             | -.883                       | 1.331       |
|                        |          | IBA+SHAM | -1.515           | .414       | .006              | -2.622                      | -.408       |
|                        |          | IBA      | -.224            | .414       | 1.000             | -1.331                      | .883        |
|                        | IBA+SHAM | IBA+SHAM | -1.739           | .414       | .002              | -2.846                      | -.632       |
|                        |          | Control  | 1.515            | .414       | .006              | .408                        | 2.622       |
|                        |          | IBA      | 1.739            | .414       | .002              | .632                        | 2.846       |
| 2d                     | Control  | IBA      | .642             | .414       | .423              | -.465                       | 1.748       |
|                        |          | IBA+SHAM | -.331            | .414       | 1.000             | -1.437                      | .776        |
|                        |          | IBA      | -.642            | .414       | .423              | -1.748                      | .465        |
|                        | IBA+SHAM | IBA+SHAM | -.972            | .414       | .096              | -2.079                      | 1.135       |
|                        |          | Control  | .331             | .414       | 1.000             | -.776                       | 1.437       |
|                        |          | IBA      | .972             | .414       | .096              | -.135                       | 2.079       |
| 4d                     | Control  | IBA      | .065             | .414       | 1.000             | -1.042                      | 1.172       |
|                        |          | IBA+SHAM | -.079            | .414       | 1.000             | -1.186                      | 1.028       |
|                        |          | IBA      | -.065            | .414       | 1.000             | -1.172                      | 1.042       |
|                        | IBA+SHAM | IBA+SHAM | -1.444           | .414       | 1.000             | -1.251                      | .963        |
|                        |          | Control  | .079             | .414       | 1.000             | -1.028                      | 1.186       |
|                        |          | IBA      | -.144            | .414       | 1.000             | -.963                       | 1.251       |

| Dependent Vari Hsp $\alpha$ NF2 |          |     |     | Pairwise Comparisons |            |                   |                             |             |
|---------------------------------|----------|-----|-----|----------------------|------------|-------------------|-----------------------------|-------------|
| Time                            |          |     |     | Mean                 | Std. Error | Sig. <sup>a</sup> | 95% Confidence Interval for |             |
|                                 |          |     |     | Difference (I-J)     |            |                   | Lower Bound                 | Upper Bound |
| 0                               | Control  | I   | III | -.720                | .876       | 1.000             | -2.876                      | 1.436       |
|                                 |          |     | II  | -1.023               | .876       | .742              | -3.179                      | 1.133       |
|                                 |          | III | I   | .720                 | .876       | 1.000             | -1.436                      | 2.876       |
|                                 |          |     | II  | -.303                | .876       | 1.000             | -2.459                      | 1.853       |
|                                 |          | II  | I   | 1.023                | .876       | .742              | -1.133                      | 3.179       |
|                                 |          |     | III | .303                 | .876       | 1.000             | -1.853                      | 2.459       |
|                                 | IBA      | I   | III | -.892                | .876       | .937              | -3.048                      | 1.264       |
|                                 |          |     | II  | -.887                | .876       | .945              | -3.043                      | 1.269       |
|                                 |          | III | I   | .892                 | .876       | .937              | -1.264                      | 3.048       |
|                                 |          |     | II  | .005                 | .876       | 1.000             | -2.151                      | 2.161       |
|                                 |          | II  | I   | .887                 | .876       | .945              | -1.269                      | 3.043       |
|                                 |          |     | III | -.005                | .876       | 1.000             | -2.161                      | 2.151       |
|                                 | IBA+SHAM | I   | III | -.014                | .876       | 1.000             | -2.170                      | 2.142       |
|                                 |          |     | II  | .548                 | .876       | 1.000             | -1.608                      | 2.704       |
|                                 |          | III | I   | .014                 | .876       | 1.000             | -2.142                      | 2.170       |
|                                 |          |     | II  | .562                 | .876       | 1.000             | -1.594                      | 2.717       |
|                                 |          | II  | I   | -.548                | .876       | 1.000             | -2.704                      | 1.608       |
|                                 |          |     | III | -.562                | .876       | 1.000             | -2.717                      | 1.594       |
| 4h                              | Control  | I   | III | 5.054 <sup>c</sup>   | .876       | .000              | 2.899                       | 7.210       |
|                                 |          |     | II  | 6.192 <sup>c</sup>   | .876       | .000              | 4.036                       | 8.348       |
|                                 |          | III | I   | -5.054 <sup>c</sup>  | .876       | .000              | -7.210                      | -2.899      |
|                                 |          |     | II  | -1.137 <sup>c</sup>  | .876       | .597              | -1.018                      | 3.293       |
|                                 |          | II  | I   | -6.192 <sup>c</sup>  | .876       | .000              | -8.348                      | -4.036      |
|                                 |          |     | III | -1.137 <sup>c</sup>  | .876       | .597              | -3.293                      | 1.018       |
|                                 | IBA      | I   | III | 4.882 <sup>c</sup>   | .876       | .000              | 2.726                       | 7.038       |
|                                 |          |     | II  | 6.328 <sup>c</sup>   | .876       | .000              | 4.172                       | 8.484       |
|                                 |          | III | I   | -4.882 <sup>c</sup>  | .876       | .000              | -7.038                      | -2.726      |
|                                 |          |     | II  | 1.445                | .876       | .312              | -.710                       | 3.601       |
|                                 |          | II  | I   | -6.328 <sup>c</sup>  | .876       | .000              | -8.484                      | -4.172      |
|                                 |          |     | III | -1.445               | .876       | .312              | -3.601                      | 7.10        |
|                                 | IBA+SHAM | I   | III | 5.760 <sup>c</sup>   | .876       | .000              | 3.604                       | 7.916       |
|                                 |          |     | II  | 7.763 <sup>c</sup>   | .876       | .000              | 5.607                       | 9.918       |
|                                 |          | III | I   | -5.760 <sup>c</sup>  | .876       | .000              | -7.916                      | -3.604      |
|                                 |          |     | II  | 2.002                | .876       | .077              | -.154                       | 4.158       |
|                                 |          | II  | I   | -7.763 <sup>c</sup>  | .876       | .000              | -9.918                      | -5.607      |
|                                 |          |     | III | -2.002               | .876       | .077              | -4.158                      | 1.54        |
| 1d                              | Control  | I   | III | -.350                | .876       | 1.000             | -2.506                      | 1.806       |
|                                 |          |     | II  | -.307                | .876       | 1.000             | -2.463                      | 1.848       |
|                                 |          | III | I   | .350                 | .876       | 1.000             | -1.806                      | 2.506       |
|                                 |          |     | II  | .042                 | .876       | 1.000             | -2.114                      | 2.198       |
|                                 |          | II  | I   | .307                 | .876       | 1.000             | -1.848                      | 2.463       |
|                                 |          |     | III | -.042                | .876       | 1.000             | -2.198                      | 2.114       |
|                                 | IBA      | I   | III | -.522                | .876       | 1.000             | -2.678                      | 1.634       |
|                                 |          |     | II  | -.172                | .876       | 1.000             | -2.327                      | 1.984       |
|                                 |          | III | I   | .522                 | .876       | 1.000             | -1.634                      | 2.678       |
|                                 |          |     | II  | .350                 | .876       | 1.000             | -1.805                      | 2.506       |
|                                 |          | II  | I   | .172                 | .876       | 1.000             | -1.984                      | 2.327       |
|                                 |          |     | III | -.350                | .876       | 1.000             | -2.506                      | 1.805       |
|                                 | IBA+SHAM | I   | III | .356                 | .876       | 1.000             | -1.800                      | 2.512       |
|                                 |          |     | II  | 1.263                | .876       | .463              | -.893                       | 3.419       |
|                                 |          | III | I   | -.356                | .876       | 1.000             | -2.512                      | 1.800       |
|                                 |          |     | II  | .907                 | .876       | .913              | -1.249                      | 3.063       |
|                                 |          | II  | I   | -1.263               | .876       | .463              | -3.419                      | .893        |
|                                 |          |     | III | -.907                | .876       | .913              | -3.063                      | 1.249       |
| 2d                              | Control  | I   | III | -.111                | .876       | 1.000             | -2.267                      | 2.045       |
|                                 |          |     | II  | -.176                | .876       | 1.000             | -2.331                      | 1.980       |
|                                 |          | III | I   | .111                 | .876       | 1.000             | -2.045                      | 2.267       |
|                                 |          |     | II  | -.065                | .876       | 1.000             | -2.221                      | 2.091       |
|                                 |          | II  | I   | .176                 | .876       | 1.000             | -1.980                      | 2.331       |
|                                 |          |     | III | .065                 | .876       | 1.000             | -2.091                      | 2.221       |
|                                 | IBA      | I   | III | -.283                | .876       | 1.000             | -2.439                      | 1.873       |
|                                 |          |     | II  | -.040                | .876       | 1.000             | -2.196                      | 2.116       |
|                                 |          | III | I   | .283                 | .876       | 1.000             | -1.873                      | 2.439       |
|                                 |          |     | II  | .243                 | .876       | 1.000             | -1.913                      | 2.399       |
|                                 |          | II  | I   | .040                 | .876       | 1.000             | -2.116                      | 2.196       |
|                                 |          |     | III | -.243                | .876       | 1.000             | -2.399                      | 1.913       |
|                                 | IBA+SHAM | I   | III | .595                 | .876       | 1.000             | -1.561                      | 2.751       |
|                                 |          |     | II  | 1.395                | .876       | .349              | -.761                       | 3.551       |
|                                 |          | III | I   | -.595                | .876       | 1.000             | -2.751                      | 1.561       |
|                                 |          |     | II  | .800                 | .876       | 1.000             | -1.356                      | 2.956       |
|                                 |          | II  | I   | -1.395               | .876       | .349              | -3.551                      | 761         |
|                                 |          |     | III | -.800                | .876       | 1.000             | -2.956                      | 1.356       |
| 4d                              | Control  | I   | III | -.144                | .876       | 1.000             | -2.300                      | 2.012       |
|                                 |          |     | II  | -.379                | .876       | 1.000             | -2.535                      | 1.777       |
|                                 |          | III | I   | .144                 | .876       | 1.000             | -2.012                      | 2.300       |
|                                 |          |     | II  | -.235                | .876       | 1.000             | -2.391                      | 1.921       |
|                                 |          | II  | I   | .379                 | .876       | 1.000             | -1.777                      | 2.535       |
|                                 |          |     | III | .235                 | .876       | 1.000             | -1.921                      | 2.391       |
|                                 | IBA      | I   | III | -.316                | .876       | 1.000             | -2.472                      | 1.839       |
|                                 |          |     | II  | -.243                | .876       | 1.000             | -2.399                      | 1.913       |
|                                 |          | III | I   | .316                 | .876       | 1.000             | -1.839                      | 2.472       |
|                                 |          |     | II  | .073                 | .876       | 1.000             | -2.083                      | 2.229       |
|                                 |          | II  | I   | .243                 | .876       | 1.000             | -1.913                      | 2.399       |
|                                 |          |     | III | -.073                | .876       | 1.000             | -2.229                      | 2.083       |
|                                 | IBA+SHAM | I   | III | .562                 | .876       | 1.000             | -1.594                      | 2.718       |
|                                 |          |     | II  | 1.192                | .876       | .536              | -.964                       | 3.348       |
|                                 |          | III | I   | -.562                | .876       | 1.000             | -2.718                      | 1.594       |
|                                 |          |     | II  | .630                 | .876       | 1.000             | -1.526                      | 2.786       |
|                                 |          | II  | I   | -1.192               | .876       | .536              | -3.348                      | .964        |
|                                 |          |     | III | -.630                | .876       | 1.000             | -2.786                      | 1.526       |

Based on estimated marginal means

\*. The mean difference is significant at the .05 level.

b. Adjustment for multiple comparisons: Bonferroni.

| Dependent Vari HspNF3 |          |     |     | Pairwise Comparisons |            |                   |                             |             |
|-----------------------|----------|-----|-----|----------------------|------------|-------------------|-----------------------------|-------------|
| Time                  |          |     |     | Mean                 | Std. Error | Sig. <sup>b</sup> | 95% Confidence Interval for |             |
|                       |          |     |     | Difference (I-J)     |            |                   | Lower Bound                 | Upper Bound |
| 0                     | Control  | I   | III | -.116                | .490       | 1.000             | -1.426                      | 1.194       |
|                       |          |     | II  | -.379                | .490       | 1.000             | -1.689                      | .931        |
|                       |          | III | I   | .116                 | .490       | 1.000             | -1.194                      | 1.426       |
|                       |          |     | II  | -.263                | .490       | 1.000             | -1.573                      | 1.046       |
|                       |          | II  | I   | .379                 | .490       | 1.000             | -.931                       | 1.689       |
|                       |          |     | III | .263                 | .490       | 1.000             | -1.046                      | 1.573       |
|                       | IBA      | I   | III | -.347                | .490       | 1.000             | -1.657                      | .963        |
|                       |          |     | II  | -.423                | .490       | 1.000             | -1.733                      | .887        |
|                       |          | III | I   | .347                 | .490       | 1.000             | -.963                       | 1.657       |
|                       |          |     | II  | -.076                | .490       | 1.000             | -1.386                      | 1.234       |
|                       |          | II  | I   | .423                 | .490       | 1.000             | -.887                       | 1.733       |
|                       |          |     | III | .076                 | .490       | 1.000             | -1.234                      | 1.386       |
|                       | IBA+SHAM | I   | III | -.288                | .490       | 1.000             | -1.598                      | 1.022       |
|                       |          |     | II  | -.346                | .490       | 1.000             | -1.655                      | .964        |
|                       |          | III | I   | .288                 | .490       | 1.000             | -1.022                      | 1.598       |
|                       |          |     | II  | -.058                | .490       | 1.000             | -1.368                      | 1.252       |
|                       |          | II  | I   | .346                 | .490       | 1.000             | -.964                       | 1.655       |
|                       |          |     | III | .058                 | .490       | 1.000             | -1.252                      | 1.368       |
| 4h                    | Control  | I   | III | 1.495 <sup>c</sup>   | .490       | .023              | .186                        | 2.805       |
|                       |          |     | II  | 2.091 <sup>c</sup>   | .490       | .002              | .782                        | 3.401       |
|                       |          | III | I   | -1.495 <sup>c</sup>  | .490       | .023              | -2.805                      | -.186       |
|                       |          |     | II  | -.596                | .490       | .724              | -.714                       | 1.906       |
|                       |          | II  | I   | -2.091 <sup>c</sup>  | .490       | .002              | -3.401                      | -.782       |
|                       |          |     | III | -.596                | .490       | .724              | -1.906                      | .714        |
|                       | IBA      | I   | III | 1.264                | .490       | .060              | -.045                       | 2.574       |
|                       |          |     | II  | 2.048 <sup>c</sup>   | .490       | .002              | .738                        | 3.357       |
|                       |          | III | I   | -1.264               | .490       | .060              | -.252                       | 2.093       |
|                       |          |     | II  | -.783                | .490       | .388              | -.526                       | 2.093       |
|                       |          | II  | I   | -2.048 <sup>c</sup>  | .490       | .002              | -3.357                      | -.738       |
|                       |          |     | III | -.783                | .490       | .388              | -2.093                      | .526        |
|                       | IBA+SHAM | I   | III | 1.323 <sup>c</sup>   | .490       | .047              | .014                        | 2.633       |
|                       |          |     | II  | 2.125 <sup>c</sup>   | .490       | .002              | .815                        | 3.434       |
|                       |          | III | I   | -1.323 <sup>c</sup>  | .490       | .047              | -2.633                      | -.014       |
|                       |          |     | II  | .801                 | .490       | .364              | -.508                       | 2.111       |
|                       |          | II  | I   | -2.125 <sup>c</sup>  | .490       | .002              | -3.434                      | -.815       |
|                       |          |     | III | -.801                | .490       | .364              | -2.111                      | .508        |
| 1d                    | Control  | I   | III | .089                 | .490       | 1.000             | -1.221                      | 1.399       |
|                       |          |     | II  | .062                 | .490       | 1.000             | -1.248                      | 1.371       |
|                       |          | III | I   | -.089                | .490       | 1.000             | -1.399                      | 1.221       |
|                       |          |     | II  | -.027                | .490       | 1.000             | -1.337                      | 1.282       |
|                       |          | II  | I   | -.062                | .490       | 1.000             | -1.371                      | 1.248       |
|                       |          |     | III | .027                 | .490       | 1.000             | -1.282                      | 1.337       |
|                       | IBA      | I   | III | -.142                | .490       | 1.000             | -1.452                      | 1.168       |
|                       |          |     | II  | .018                 | .490       | 1.000             | -1.292                      | 1.327       |
|                       |          | III | I   | .142                 | .490       | 1.000             | -1.168                      | 1.452       |
|                       |          |     | II  | .160                 | .490       | 1.000             | -1.150                      | 1.470       |
|                       |          | II  | I   | -.018                | .490       | 1.000             | -1.327                      | 1.292       |
|                       |          |     | III | -.160                | .490       | 1.000             | -1.470                      | 1.150       |
|                       | IBA+SHAM | I   | III | -.083                | .490       | 1.000             | -1.227                      | 1.093       |
|                       |          |     | II  | .095                 | .490       | 1.000             | -1.215                      | 1.405       |
|                       |          | III | I   | .083                 | .490       | 1.000             | -1.227                      | 1.393       |
|                       |          |     | II  | .178                 | .490       | 1.000             | -.132                       | 1.488       |
|                       |          | II  | I   | -.095                | .490       | 1.000             | -1.405                      | 1.215       |
|                       |          |     | III | -.178                | .490       | 1.000             | -1.488                      | 1.132       |
| 2d                    | Control  | I   | III | .055                 | .490       | 1.000             | -1.255                      | 1.364       |
|                       |          |     | II  | .184                 | .490       | 1.000             | -1.126                      | 1.493       |
|                       |          | III | I   | -.055                | .490       | 1.000             | -1.364                      | 1.255       |
|                       |          |     | II  | .129                 | .490       | 1.000             | -1.181                      | 1.439       |
|                       |          | II  | I   | -.184                | .490       | 1.000             | -1.493                      | 1.126       |
|                       |          |     | III | -.129                | .490       | 1.000             | -1.439                      | 1.181       |
|                       | IBA      | I   | III | -.177                | .490       | 1.000             | -1.486                      | 1.133       |
|                       |          |     | II  | .140                 | .490       | 1.000             | -1.170                      | 1.448       |
|                       |          | III | I   | -.177                | .490       | 1.000             | -1.133                      | 1.448       |
|                       |          |     | II  | .177                 | .490       | 1.000             | -.993                       | 1.626       |
|                       |          | II  | I   | -.140                | .490       | 1.000             | -1.449                      | 1.170       |
|                       |          |     | III | -.316                | .490       | 1.000             | -1.626                      | .993        |
|                       | IBA+SHAM | I   | III | -.117                | .490       | 1.000             | -1.427                      | 1.192       |
|                       |          |     | II  | .217                 | .490       | 1.000             | -1.093                      | 1.527       |
|                       |          | III | I   | -.117                | .490       | 1.000             | -1.192                      | 1.427       |
|                       |          |     | II  | .334                 | .490       | 1.000             | -.975                       | 1.644       |
|                       |          | II  | I   | -.217                | .490       | 1.000             | -1.527                      | 1.093       |
|                       |          |     | III | -.334                | .490       | 1.000             | -1.644                      | .975        |
| 4d                    | Control  | I   | III | .172                 | .490       | 1.000             | -1.138                      | 1.482       |
|                       |          |     | II  | .091                 | .490       | 1.000             | -1.219                      | 1.400       |
|                       |          | III | I   | -.172                | .490       | 1.000             | -1.482                      | 1.138       |
|                       |          |     | II  | -.081                | .490       | 1.000             | -1.391                      | 1.228       |
|                       |          | II  | I   | -.091                | .490       | 1.000             | -1.400                      | 1.219       |
|                       |          |     | III | .081                 | .490       | 1.000             | -1.228                      | 1.391       |
|                       | IBA      | I   | III | -.059                | .490       | 1.000             | -1.369                      | 1.250       |
|                       |          |     | II  | .047                 | .490       | 1.000             | -1.263                      | 1.356       |
|                       |          | III | I   | .059                 | .490       | 1.000             | -1.250                      | 1.369       |
|                       |          |     | II  | .106                 | .490       | 1.000             | -1.204                      | 1.416       |
|                       |          | II  | I   | -.047                | .490       | 1.000             | -1.356                      | 1.263       |
|                       |          |     | III | -.106                | .490       | 1.000             | -1.416                      | 1.204       |
|                       | IBA+SHAM | I   | III | .000                 | .490       | 1.000             | -1.310                      | 1.310       |
|                       |          |     | II  | .124                 | .490       | 1.000             | -.186                       | 1.434       |
|                       |          | III | I   | .000                 | .490       | 1.000             | -1.310                      | 1.310       |
|                       |          |     | II  | .124                 | .490       | 1.000             | -.186                       | 1.434       |
|                       |          | II  | I   | -.124                | .490       | 1.000             | -1.434                      | 1.186       |
|                       |          |     | III | -.124                | .490       | 1.000             | -1.434                      | 1.186       |
