# Supplementary figures and images for: Selection of Reference Genes for Transcription Studies Considering Co-Regulation and Average Transcriptional Stability: Case Study on Adventitious Root Induction in Olive (Olea europaea L.) Microshoots
Source: MDPI journal article supplement (doi:10.3390/agronomy12123201), 2022-12-16

Figure S1. Additional gel verification of single bands for transcripts

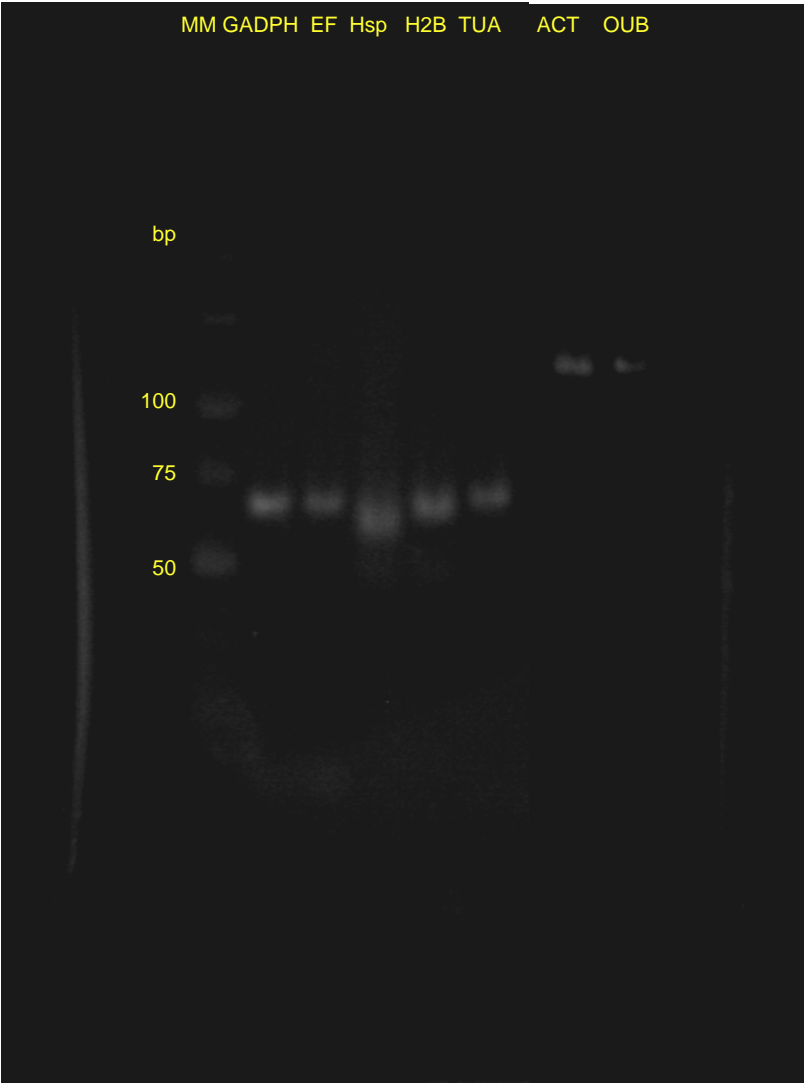

Supplement: s1 [file s1]
